# Supplementary material
Source: PubMed Central journal article supplement (PMC4288860)
Supplement: IAI.02396-14_zii999091004so1.pdf [file IAI.02396-14_zii999091004so1.pdf]

**Appendix** (Oral streptococci inhibit *P. aeruginosa*, J. Scoffield and H. Wu)

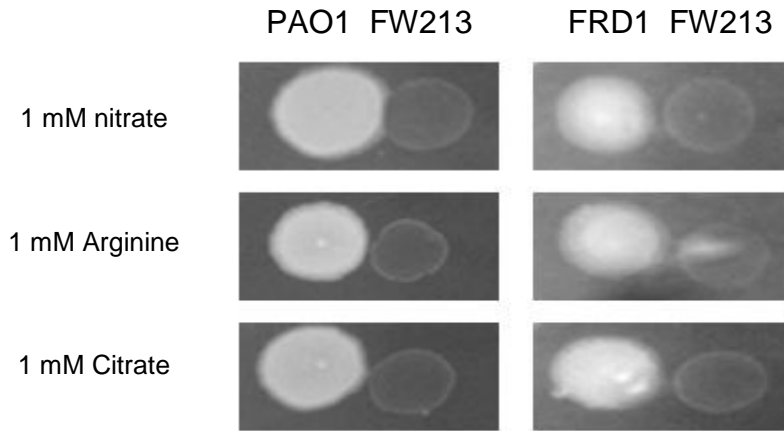

**Fig. A1. Nitrate, arginine, and citrate do not facilitate inhibition of *P. aeruginosa*.** Competition assay of oral streptococci species *S. parasanguinis* FW213 with PAO1 and FRD1.

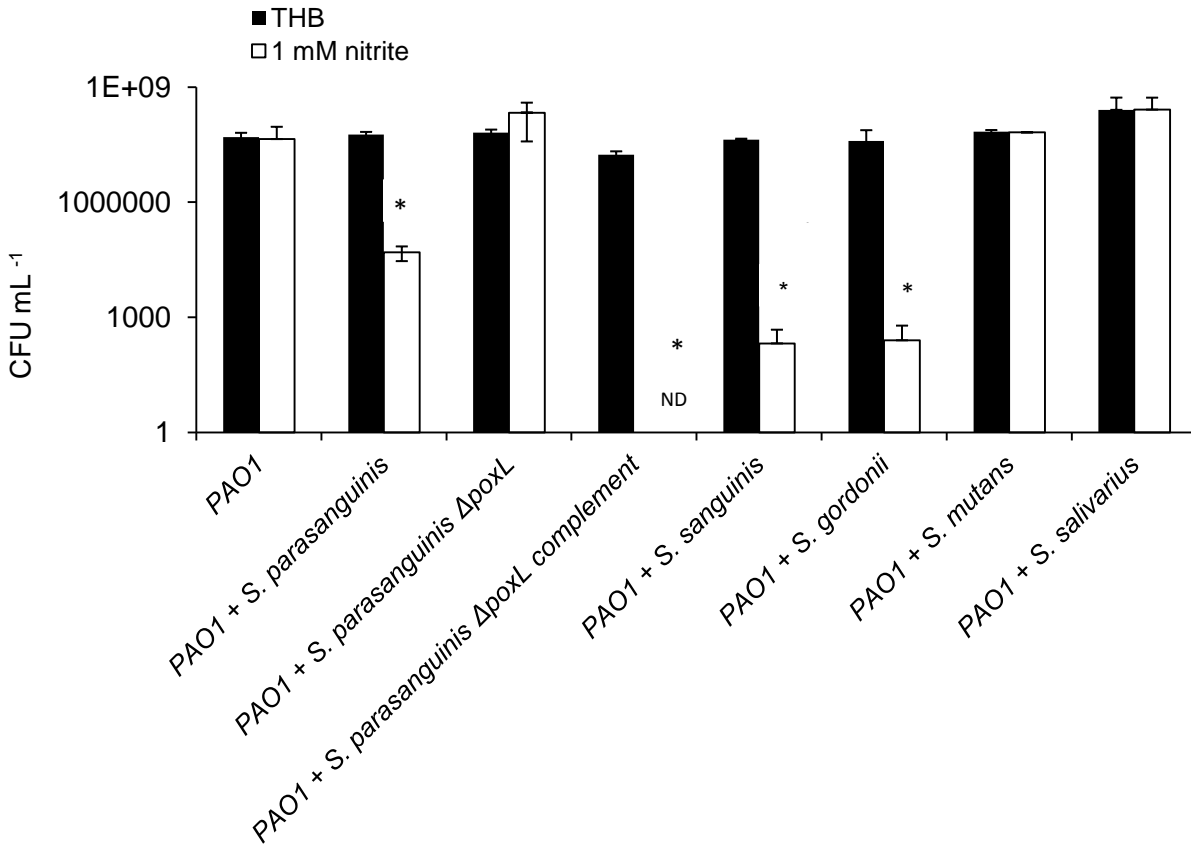

**Fig. A2. The acute *P. aeruginosa* isolate, PAO1 is inhibited during co-culture with oral streptococci in the presence of nitrite.** Co-culture of PAO1 and oral streptococci in THB +/- 1mM nitrite. CFUs were determined after 16 hour incubation. \*  $P < 0.005$  (Student *t* test). ND=no CFUs detected.

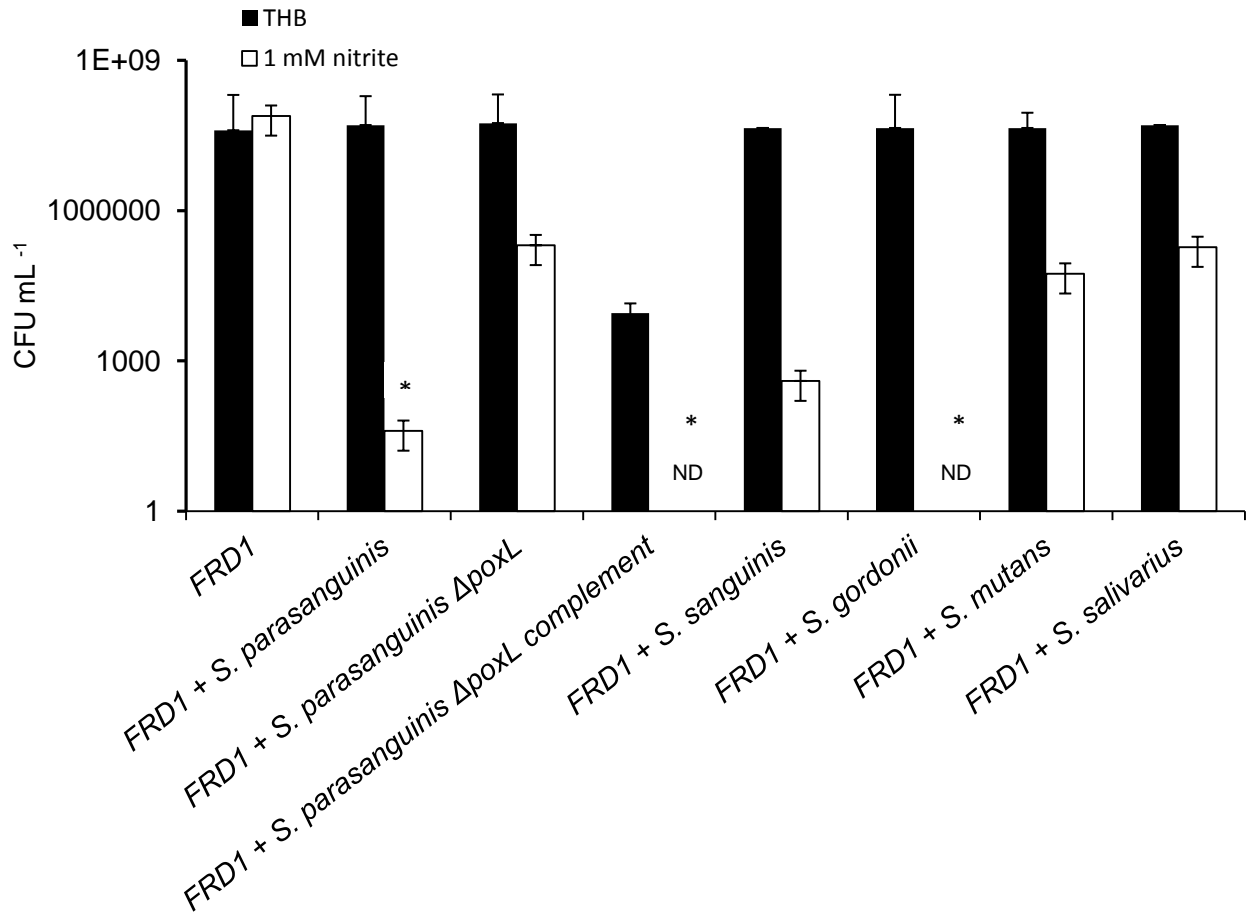

**Fig. A3. The chronic *P. aeruginosa* isolate, FRD1 is inhibited during co-culture with oral streptococci in the presence of nitrite.** Co-culture assay of FRD1 and oral streptococci in THB +/- 1mM nitrite. CFUs were determined after 16 hour incubation. \*  $P < 0.005$  (Student  $t$  test). ND=no CFUs detected.
